# Supplementary material for: Systematic Review of Kidney Injury Biomarkers for the Evaluation of CKD of Uncertain Etiology
Source: PubMed Central journal article supplement — Kidney Int Rep. 2024 Mar 19;9(6):1614–32. doi: 10.1016/j.ekir.2024.03.013 (PMC11184258; doi:10.1016/j.ekir.2024.03.013), 2024-03-19
Supplement: mmc1.pdf [file mmc1.pdf]

## Supplementary Materials

| <b>Prisma Checklist.</b>      |               |                                                                                                                                                                                                                                                                                                        |                                        |
|-------------------------------|---------------|--------------------------------------------------------------------------------------------------------------------------------------------------------------------------------------------------------------------------------------------------------------------------------------------------------|----------------------------------------|
| <b>Section and Topic</b>      | <b>Item #</b> | <b>Checklist item</b>                                                                                                                                                                                                                                                                                  | <b>Location where item is reported</b> |
| <b>TITLE</b>                  |               |                                                                                                                                                                                                                                                                                                        |                                        |
| Title                         | 1             | Identify the report as a systematic review.                                                                                                                                                                                                                                                            | 1                                      |
| <b>ABSTRACT</b>               |               |                                                                                                                                                                                                                                                                                                        |                                        |
| Abstract                      | 2             | See the PRISMA 2020 for Abstracts checklist.                                                                                                                                                                                                                                                           | 2                                      |
| <b>INTRODUCTION</b>           |               |                                                                                                                                                                                                                                                                                                        |                                        |
| Rationale                     | 3             | Describe the rationale for the review in the context of existing knowledge.                                                                                                                                                                                                                            | 3                                      |
| Objectives                    | 4             | Provide an explicit statement of the objective(s) or question(s) the review addresses.                                                                                                                                                                                                                 | 4                                      |
| <b>METHODS</b>                |               |                                                                                                                                                                                                                                                                                                        |                                        |
| Eligibility criteria          | 5             | Specify the inclusion and exclusion criteria for the review and how studies were grouped for the syntheses.                                                                                                                                                                                            | 4                                      |
| Information sources           | 6             | Specify all databases, registers, websites, organisations, reference lists and other sources searched or consulted to identify studies. Specify the date when each source was last searched or consulted.                                                                                              | 4                                      |
| Search strategy               | 7             | Present the full search strategies for all databases, registers and websites, including any filters and limits used.                                                                                                                                                                                   | 4, Appendix 1                          |
| Selection process             | 8             | Specify the methods used to decide whether a study met the inclusion criteria of the review, including how many reviewers screened each record and each report retrieved, whether they worked independently, and if applicable, details of automation tools used in the process.                       | 4                                      |
| Data collection process       | 9             | Specify the methods used to collect data from reports, including how many reviewers collected data from each report, whether they worked independently, any processes for obtaining or confirming data from study investigators, and if applicable, details of a automation tools used in the process. | 4                                      |
| Data items                    | 10a           | List and define all outcomes for which data were sought. Specify whether all results that were compatible with each outcome domain in each study were sought (e.g. for all measures, time points, analyses), and if not, the methods used to decide which results to collect.                          | 4                                      |
|                               | 10b           | List and define all other variables for which data were sought (e.g. participant and intervention characteristics, funding sources). Describe any assumptions made about any missing or unclear information.                                                                                           | 4                                      |
| Study risk of bias assessment | 11            | Specify the methods used to assess risk of bias in the included studies, including details of the tool(s) used, how many reviewers assessed each study and whether they worked independently, and if applicable, details of automation tools used in the process.                                      | 4, 15                                  |
| Effect measures               | 12            | Specify for each outcome the effect measure(s) (e.g. risk ratio, mean difference) used in the synthesis or presentation of results.                                                                                                                                                                    | Table 2                                |
| Synthesis methods             | 13a           | Describe the processes used to decide which studies were eligible for each synthesis (e.g. tabulating the study intervention characteristics and comparing against the planned groups for each synthesis (item #5)).                                                                                   | 4-5                                    |
|                               | 13b           | Describe any methods required to prepare the data for presentation or synthesis, such as handling of missing summary statistics, or data conversions.                                                                                                                                                  | 4-5                                    |
|                               | 13c           | Describe any methods used to tabulate or visually display results of individual studies and syntheses.                                                                                                                                                                                                 | 4-5, Figure 4                          |
|                               | 13d           | Describe any methods used to synthesize results and provide a rationale for the choice(s). If meta-analysis was performed, describe the model(s), method(s) to identify the presence and extent of statistical heterogeneity, and software package(s) used.                                            | NA                                     |
|                               | 13e           | Describe any methods used to explore possible causes of heterogeneity among study results (e.g. subgroup analysis, meta-regression).                                                                                                                                                                   | NA                                     |
|                               | 13f           | Describe any sensitivity analyses conducted to assess robustness of the synthesized results.                                                                                                                                                                                                           | NA                                     |

| <b>Prisma Checklist.</b>      |               |                                                                                                                                                                                                                                                                                      |                                        |
|-------------------------------|---------------|--------------------------------------------------------------------------------------------------------------------------------------------------------------------------------------------------------------------------------------------------------------------------------------|----------------------------------------|
| <b>Section and Topic</b>      | <b>Item #</b> | <b>Checklist item</b>                                                                                                                                                                                                                                                                | <b>Location where item is reported</b> |
| Reporting bias assessment     | 14            | Describe any methods used to assess risk of bias due to missing results in a synthesis (arising from reporting biases).                                                                                                                                                              | NA                                     |
| Certainty assessment          | 15            | Describe any methods used to assess certainty (or confidence) in the body of evidence for an outcome.                                                                                                                                                                                | NA                                     |
| <b>RESULTS</b>                |               |                                                                                                                                                                                                                                                                                      |                                        |
| Study selection               | 16a           | Describe the results of the search and selection process, from the number of records identified in the search to the number of studies included in the review, ideally using a flow diagram.                                                                                         | 4-5                                    |
|                               | 16b           | Cite studies that might appear to meet the inclusion criteria, but which were excluded, and explain why they were excluded.                                                                                                                                                          | 4-5, Fig 1                             |
| Study characteristics         | 17            | Cite each included study and present its characteristics.                                                                                                                                                                                                                            | Table 1                                |
| Risk of bias in studies       | 18            | Present assessments of risk of bias for each included study.                                                                                                                                                                                                                         | NA                                     |
| Results of individual studies | 19            | For all outcomes, present, for each study: (a) summary statistics for each group (where appropriate) and (b) an effect estimate and its precision (e.g. confidence/credible interval), ideally using structured tables or plots.                                                     | Table 2, Table S3                      |
| Results of syntheses          | 20a           | For each synthesis, briefly summarise the characteristics and risk of bias among contributing studies.                                                                                                                                                                               | 5-15                                   |
|                               | 20b           | Present results of all statistical syntheses conducted. If meta-analysis was done, present for each the summary estimate and its precision (e.g. confidence/credible interval) and measures of statistical heterogeneity. If comparing groups, describe the direction of the effect. | NA                                     |
|                               | 20c           | Present results of all investigations of possible causes of heterogeneity among study results.                                                                                                                                                                                       | NA                                     |
|                               | 20d           | Present results of all sensitivity analyses conducted to assess the robustness of the synthesized results.                                                                                                                                                                           | NA                                     |
| Reporting biases              | 21            | Present assessments of risk of bias due to missing results (arising from reporting biases) for each synthesis assessed.                                                                                                                                                              | NA                                     |
| Certainty of evidence         | 22            | Present assessments of certainty (or confidence) in the body of evidence for each outcome assessed.                                                                                                                                                                                  | NA                                     |
| <b>DISCUSSION</b>             |               |                                                                                                                                                                                                                                                                                      |                                        |
| Discussion                    | 23a           | Provide a general interpretation of the results in the context of other evidence.                                                                                                                                                                                                    | NA                                     |
|                               | 23b           | Discuss any limitations of the evidence included in the review.                                                                                                                                                                                                                      | 15-16                                  |
|                               | 23c           | Discuss any limitations of the review processes used.                                                                                                                                                                                                                                | 15-16                                  |
|                               | 23d           | Discuss implications of the results for practice, policy, and future research.                                                                                                                                                                                                       | 15-17                                  |
| <b>OTHER INFORMATION</b>      |               |                                                                                                                                                                                                                                                                                      |                                        |
| Registration and protocol     | 24a           | Provide registration information for the review, including register name and registration number, or state that the review was not registered.                                                                                                                                       | NA                                     |
|                               | 24b           | Indicate where the review protocol can be accessed, or state that a protocol was not prepared.                                                                                                                                                                                       | 4                                      |
|                               | 24c           | Describe and explain any amendments to information provided at registration or in the protocol.                                                                                                                                                                                      | NA                                     |
| Support                       | 25            | Describe sources of financial or non-financial support for the review, and the role of the funders or sponsors in the review.                                                                                                                                                        | 19                                     |
| Competing interests           | 26            | Declare any competing interests of review authors.                                                                                                                                                                                                                                   | 19                                     |

**Prisma Checklist.**

| Section and Topic                              | Item # | Checklist item                                                                                                                                                                                                                             | Location where item is reported |
|------------------------------------------------|--------|--------------------------------------------------------------------------------------------------------------------------------------------------------------------------------------------------------------------------------------------|---------------------------------|
| Availability of data, code and other materials | 27     | Report which of the following are publicly available and where they can be found: template data collection forms; data extracted from included studies; data used for all analyses; analytic code; any other materials used in the review. | NA                              |

*From:* Page MJ, McKenzie JE, Bossuyt PM, Boutron I, Hoffmann TC, Mulrow CD, et al. The PRISMA 2020 statement: an updated guideline for reporting systematic reviews. *BMJ* 2021;372:n71. doi: 10.1136/bmj.n71

For more information, visit: <http://www.prisma-statement.org/>

| <b>Supplemental Table 1.</b> Longitudinal studies of kidney injury biomarkers in CKDu.                                                                                                                                                                                                                                                                                                                                                              |                |                                                                                                                 |                            |                                                            |                                                                                                        |
|-----------------------------------------------------------------------------------------------------------------------------------------------------------------------------------------------------------------------------------------------------------------------------------------------------------------------------------------------------------------------------------------------------------------------------------------------------|----------------|-----------------------------------------------------------------------------------------------------------------|----------------------------|------------------------------------------------------------|--------------------------------------------------------------------------------------------------------|
|                                                                                                                                                                                                                                                                                                                                                                                                                                                     | <b>Country</b> | <b>Biomarker(s)</b>                                                                                             | <b>Length of Follow Up</b> | <b>No. of Kidney Biomarker Assessments</b>                 | <b>Study Outcome(s)</b>                                                                                |
| Hansson, et al. <i>Occup Environ Med</i> , 2022                                                                                                                                                                                                                                                                                                                                                                                                     | Nicaragua      | Urinary KIM-1<br>Urinary MCP-1<br>Urinary Calbindin<br>Urinary GST- $\pi$<br>Urinary Clusterin<br>Urinary IL-18 | 6 months                   | 2 (pre-harvest and post-harvest)                           | Change in SCr<br>Change in biomarker concentration                                                     |
| Wesseling, et al. <i>Envi Res</i> , 2016                                                                                                                                                                                                                                                                                                                                                                                                            | Nicaragua      | Urinary KIM-1<br>Urinary NGAL<br>Urinary Hsp72                                                                  | 2.3 months                 | 3 (harvest day 1, harvest day 6, and 9 weeks into harvest) | Change in SCr<br>Change in biomarker concentration<br>Change in serum electrolytes and serum uric acid |
| Laws, et al. <i>AJKD</i> , 2016                                                                                                                                                                                                                                                                                                                                                                                                                     | Nicaragua      | Urinary NGAL<br>Urinary IL-18<br>Urinary NAG                                                                    | 4-6 months                 | 2 (pre-harvest and late harvest)                           | Change in eGFR<br>Change in UACR<br>Change in biomarker concentration                                  |
| Gonzalez-Quiroz, et al. <i>J Am Soc Nephrol</i> , 2018 <sup>†</sup>                                                                                                                                                                                                                                                                                                                                                                                 | Nicaragua      | Urinary NGAL                                                                                                    | 2.5 years                  | 5 (baseline and every six months)                          | eGFR trajectory (rate of decline)                                                                      |
| Gonzalez-Quiroz, et al. <i>BMC Nephrol</i> , 2019 <sup>†</sup>                                                                                                                                                                                                                                                                                                                                                                                      | Nicaragua      | Urinary NGAL                                                                                                    | 2.5 years                  | 5 (baseline and every six months)                          | eGFR trajectory (rate of decline)                                                                      |
| Butler-Dawson, et al. <i>J Expo Sci Environ Epidemiol</i> , 2022 <sup>‡</sup>                                                                                                                                                                                                                                                                                                                                                                       | Guatemala      | Urinary NGAL                                                                                                    | 8 months                   | 2 (baseline and two months later)                          | Change in eGFR<br>Association between NGAL, eGFR, and urinary metal concentration                      |
| <sup>†</sup> These two manuscripts describe the same study population, with differing analyses.<br><sup>‡</sup> This study selected a subset of patients for longitudinal analysis.                                                                                                                                                                                                                                                                 |                |                                                                                                                 |                            |                                                            |                                                                                                        |
| Abbreviations: CKDu, chronic kidney disease of uncertain etiology; eGFR, estimated glomerular filtration rate; GST- $\pi$ , glutathione-S-transferase pi; Hsp72, heat shock protein 72; IL-18, interleukin 18; KIM-1, kidney injury molecule 1; MCP-1, monocyte chemoattractant factor 1; NAG, N-acetyl-beta-D-glucosaminidase; NGAL, neutrophil gelatinase-associated lipocalin; SCr, serum creatinine; UACR, urinary albumin-to-creatinine ratio. |                |                                                                                                                 |                            |                                                            |                                                                                                        |

| <b>Supplemental Table 2. Urinary Biomarker Concentrations</b>                                                                                                                                                                                                                                                                                                                                                                                                                                                                                                                                                                                                                                                                                                                                                                                                                                                                                                                                                                                   |                     |                     |
|-------------------------------------------------------------------------------------------------------------------------------------------------------------------------------------------------------------------------------------------------------------------------------------------------------------------------------------------------------------------------------------------------------------------------------------------------------------------------------------------------------------------------------------------------------------------------------------------------------------------------------------------------------------------------------------------------------------------------------------------------------------------------------------------------------------------------------------------------------------------------------------------------------------------------------------------------------------------------------------------------------------------------------------------------|---------------------|---------------------|
|                                                                                                                                                                                                                                                                                                                                                                                                                                                                                                                                                                                                                                                                                                                                                                                                                                                                                                                                                                                                                                                 | <b>NGAL (ng/mg)</b> | <b>KIM-1 (ng/g)</b> |
| <b>Adult Populations</b>                                                                                                                                                                                                                                                                                                                                                                                                                                                                                                                                                                                                                                                                                                                                                                                                                                                                                                                                                                                                                        |                     |                     |
| Abdul, et al. <i>Int J Environ Res Public Health</i> , 2021 ‡                                                                                                                                                                                                                                                                                                                                                                                                                                                                                                                                                                                                                                                                                                                                                                                                                                                                                                                                                                                   | 2.1                 | 3.1                 |
| De Silva, et al. <i>PLOS Negl Trop Dis</i> , 2016 †                                                                                                                                                                                                                                                                                                                                                                                                                                                                                                                                                                                                                                                                                                                                                                                                                                                                                                                                                                                             | 0.4                 | 460                 |
| Ekanayake, et al. <i>Int J Environ Res Public Health</i> , 2022 ‡                                                                                                                                                                                                                                                                                                                                                                                                                                                                                                                                                                                                                                                                                                                                                                                                                                                                                                                                                                               | 5.2                 | 1600                |
| Fernando, et al. <i>KIR</i> , 2019 ‡                                                                                                                                                                                                                                                                                                                                                                                                                                                                                                                                                                                                                                                                                                                                                                                                                                                                                                                                                                                                            | 0.01                | 0.07                |
| Wijkstrom, et al. <i>PLOS One</i> , 2018 *                                                                                                                                                                                                                                                                                                                                                                                                                                                                                                                                                                                                                                                                                                                                                                                                                                                                                                                                                                                                      | 0.00005             | 1100                |
| Wanigasuriya, et al. <i>Ceylon Med J</i> , 2017 ‡                                                                                                                                                                                                                                                                                                                                                                                                                                                                                                                                                                                                                                                                                                                                                                                                                                                                                                                                                                                               |                     | 533.4               |
| Kulasooriya, et al. <i>Int J Envi Res Public Health</i> , 2021 *                                                                                                                                                                                                                                                                                                                                                                                                                                                                                                                                                                                                                                                                                                                                                                                                                                                                                                                                                                                | 0.42                |                     |
| Hansson, et al. <i>Occup Environ Med</i> , 2022 ‡                                                                                                                                                                                                                                                                                                                                                                                                                                                                                                                                                                                                                                                                                                                                                                                                                                                                                                                                                                                               |                     | 6300                |
| Wesseling, et al. <i>Envi Res</i> , 2016 ‡                                                                                                                                                                                                                                                                                                                                                                                                                                                                                                                                                                                                                                                                                                                                                                                                                                                                                                                                                                                                      | 8.0                 | 3.95                |
| Laws, et al. <i>AJKD</i> , 2016                                                                                                                                                                                                                                                                                                                                                                                                                                                                                                                                                                                                                                                                                                                                                                                                                                                                                                                                                                                                                 | 10.0                |                     |
| Petropoulos, et al. <i>Kidney360</i> , 2020 †                                                                                                                                                                                                                                                                                                                                                                                                                                                                                                                                                                                                                                                                                                                                                                                                                                                                                                                                                                                                   | 10.4                |                     |
| Gonzalez-Quiroz, et al. <i>BMC Nephrol</i> , 2019 ‡                                                                                                                                                                                                                                                                                                                                                                                                                                                                                                                                                                                                                                                                                                                                                                                                                                                                                                                                                                                             | 0.05                |                     |
| Butler-Dawson, et al. <i>J Expo Sci Environ Epidemiol</i> , 2022 * ‡                                                                                                                                                                                                                                                                                                                                                                                                                                                                                                                                                                                                                                                                                                                                                                                                                                                                                                                                                                            | 4.3                 |                     |
| Diaz de Leon-Martinez, et al. <i>Envi Sci Pollut Res Int</i> , 2019 * ‡                                                                                                                                                                                                                                                                                                                                                                                                                                                                                                                                                                                                                                                                                                                                                                                                                                                                                                                                                                         | 6.8                 | 185                 |
| <b>Pediatric Populations</b>                                                                                                                                                                                                                                                                                                                                                                                                                                                                                                                                                                                                                                                                                                                                                                                                                                                                                                                                                                                                                    |                     |                     |
| De Silva, et al. <i>Children</i> , 2021 ‡                                                                                                                                                                                                                                                                                                                                                                                                                                                                                                                                                                                                                                                                                                                                                                                                                                                                                                                                                                                                       | 3.1                 | 100                 |
| Gunasekara, et al. <i>Sci Rep</i> , 2022 ‡                                                                                                                                                                                                                                                                                                                                                                                                                                                                                                                                                                                                                                                                                                                                                                                                                                                                                                                                                                                                      | 3.2                 | 200                 |
| Gunasekara, et al. <i>Ped Neph</i> , 2023 ‡                                                                                                                                                                                                                                                                                                                                                                                                                                                                                                                                                                                                                                                                                                                                                                                                                                                                                                                                                                                                     | 232                 | 3.5                 |
| Ramirez-Rubio, et al. <i>NDT</i> , 2016 ‡                                                                                                                                                                                                                                                                                                                                                                                                                                                                                                                                                                                                                                                                                                                                                                                                                                                                                                                                                                                                       | 13.3                |                     |
| Leibler, et al. <i>Ped Neph</i> , 2021 ‡                                                                                                                                                                                                                                                                                                                                                                                                                                                                                                                                                                                                                                                                                                                                                                                                                                                                                                                                                                                                        | 9.0                 | 812.6               |
| Cardenas-Gonzalez, et al. <i>Environ Res</i> , 2016 †                                                                                                                                                                                                                                                                                                                                                                                                                                                                                                                                                                                                                                                                                                                                                                                                                                                                                                                                                                                           | 83.4                | 518.8               |
| <p>Values expressed as mean, geometric mean(†), or median(‡) for the overall study population, including all subgroups of exposure and baseline kidney function. Among studies for which no overall, summary biomarker concentration was provided, a weighted mean or median was calculated (weighted for the number of participants in each clinical phenotype, observational group, or exposure category). Due to inconsistencies in reporting measures of variability across studies (or missing measures of variability), variability is not reported in this table. Blanks indicate that the biomarker was not studied.</p> <p>* These studies report non-normalized biomarker concentrations. To facilitate comparisons to normalized values, the values are shown in units of ng/L for KIM-1 or ng/ml for NGAL. This is because approximate urine output is 1L/day and approximate urine creatinine excretion is 1g/day; therefore the units ng/g and ng/L (or ng/mg and ng/ml) are roughly comparable within an order of magnitude.</p> |                     |                     |

**Web of Science Search (2/13/2023)**

((((ALL=(CKDu)) OR ALL=("Mesoamerican nephropathy")) OR ALL=("CKD of unknown etiology")) AND (ALL=(biomarker) OR ALL=(urin\*) OR ALL=(plasma)))

## **CKD Biomarkers and Multi-Omics Platforms Not Yet Studied in CKDu**

The CKD biomarker literature includes multiple candidate kidney biomarkers that have not been studied in CKDu to date. The following is a brief overview of biomarkers that may be considered in future CKDu studies based on relevant biology and promising associations in the CKD literature.

### ***Urinary Uromodulin***

Uromodulin (UMOD) is a protein expressed by tubular epithelial cells in the thick ascending limb of the loop of Henle and is the most abundant protein expressed in the kidney and excreted in the urine in healthy individuals. UMOD regulates salt homeostasis by modulating NKCC2, prevents urinary infections, and inhibits stone formation. Investigators have consistently identified *UMOD* in genome-wide association studies of kidney function and hypertension.<sup>51</sup> Rare variant mutations in UMOD cause autosomal dominant tubulointerstitial kidney disease (ADTKD),<sup>52,53</sup> which shares histopathological features with CKDu.<sup>54</sup> Epidemiologic studies have shown that lower urinary UMOD concentration is associated with tubulointerstitial lesion severity,<sup>55</sup> incident CKD,<sup>56</sup> and eGFR decline<sup>55-7</sup> and that higher serum UMOD is associated with lower risk of progression to ESKD.<sup>58,9</sup>

### ***Urinary Epidermal growth factor***

Epidermal growth factor (EGF) is produced by nearly every tissue type and stimulates cell growth and differentiation. In the kidney, EGF acts as a renal tubular trophic factor and is hypothesized to mediate tubular repair. EGF was identified in a kidney biopsy transcriptomic study in which candidate genes and proteins were prioritized by correlation with eGFR, kidney specificity of transcript and protein expression, and relevant biology.<sup>510</sup> EGF emerged as the top candidate, and in clinical studies lower urinary EGF was associated with more severe interstitial fibrosis and

tubular atrophy in patients with primarily glomerular diseases.<sup>S10</sup> Low urinary EGF has also been studied in clinical cohorts of traditional CKD and AKI as a biomarker of kidney disease progression, rapid eGFR decline, and incident CKD.<sup>S11–17</sup>

### ***Plasma soluble tumor necrosis factor receptors***

Soluble tumor necrosis factor receptor-1 (sTNFR-1) and sTNFR-2 serve as inflammatory markers in the systemic circulation, where they participate in TNF signaling pathways. In the bound form, TNFR-1 is expressed by nearly all cell types, whereas TNFR-2 is expressed by hematopoietic, immunologic, and endothelial cells.<sup>S18, S19</sup> Higher levels of circulating sTNFR-1 were associated with increased interstitial fibrosis, tubular atrophy, mesangial expansion, and glomerular inflammation in patients undergoing clinically indicated kidney biopsy.<sup>S20</sup> Both sTNFR-1 and sTNFR-2 have been studied in several prospective cohorts in the traditional CKD literature<sup>S20–25</sup> and are associated with adverse kidney outcomes in a recent meta-analysis.<sup>S26</sup>

### ***Plasma KIM-1***

Although mostly studied in urine, KIM-1 may also enter the circulation after release into the interstitium by injured tubular cells that have lost their polarity or detached from the basement membrane.<sup>S27</sup> Plasma KIM-1 has been studied in several prospective cohorts in the traditional CKD literature.<sup>S23, S25, S28–30</sup> A recent meta-analysis of these studies showed a strong association between plasma KIM-1 and a pooled kidney outcome of incident CKD, CKD progression, or incident ESKD.<sup>S26</sup>

### **Proteomics and Metabolomics**

Another promising area of kidney research beyond traditional biomarkers is in the fields of proteomics and metabolomics.<sup>S31–33</sup> These techniques are increasingly used in investigations



of CKD to facilitate a deeper understanding of molecular patterns of disease, as well as risk for eGFR decline.<sup>S34-40</sup> Combining metabolomic analyses with genomics and proteome-wide association studies may advance causal inference in CKD.<sup>S41, S42</sup> Integrated or multi-“omics” strategies may be particularly relevant to improving risk stratification and disease phenotyping in CKDu, where little is known about the underlying pathophysiology in early stages of the disease.<sup>S43</sup> Omics data may also provide insight into molecular pathways that are potential therapeutic targets for treatment of CKDu.<sup>S33</sup>

### Supplemental References:

- S1. Devuyst O, Bochud M, Olinger E. UMOD and the architecture of kidney disease. *European Journal of Physiology*. 2022;474(8):771-781. doi:10.1007/s00424-022-02733-4
- S2. Devuyst O, Olinger E, Rampoldi L. Uromodulin: From physiology to rare and complex kidney disorders. *Nat Rev Nephrol*. 2017;13(9):525-544. doi:10.1038/nrneph.2017.101
- S3. Olinger E, Schaeffer C, Kidd K, et al. An intermediate effect size variant in UMOD confers risk for chronic kidney disease. *PNAS*. 2022;119(33). doi:10.1073/pnas.2114734119/-/DCSupplemental.Published
- S4. Bernascone I, Janas S, Ikehata M, et al. A transgenic mouse model for uromodulin-associated kidney diseases shows specific tubulo-interstitial damage, urinary concentrating defect and renal failure. *Hum Mol Genet*. 2010;19(15):2998-3010. doi:10.1093/hmg/ddq205
- S5. Zhou J, Chen Y, Liu Y, et al. Urinary Uromodulin Excretion Predicts Progression of Chronic Kidney Disease Resulting from IgA Nephropathy. *PLoS One*. 2013;8(8):1-6. doi:10.1371/journal.pone.0071023
- S6. Garimella PS, Katz R, Ix JH, et al. Association of urinary uromodulin with kidney function decline and mortality : the health ABC study. *Clin Nephrol*. 2017;87(6):278-286. doi:10.5414/CN109005
- S7. Steubl D, Block M, Herbst V, et al. Urinary uromodulin independently predicts end- stage renal disease and rapid kidney function decline in a cohort of chronic kidney disease patients. *Medicine*. 2019;98(21).
- S8. Steubl D, Schneider MP, Meiselbach H, et al. Association of serum uromodulin with death, cardiovascular events, and kidney failure in CKD. *Clinical Journal of the American Society of Nephrology*. 2020;15(5):616-624. doi:10.2215/CJN.11780919
- S9. Steubl D, Buzkova P, Garimella PS, et al. Association of Serum Uromodulin With ESKD and Kidney Function Decline in the Elderly: The Cardiovascular Health Study. *American Journal of Kidney Diseases*. 2019;74(4):501-509. doi:10.1053/j.ajkd.2019.02.024

- S10. Ju W, Nair V, Smith S, et al. Tissue transcriptome-driven identification of epidermal growth factor as a chronic kidney disease biomarker. *Sci Transl Med*. 2015;7(316):193. doi:10.1126/scitranslmed.aac7071
- S11. Satirapoj B, Dispan R, Radinahamed P, Kitiyakara C. Urinary epidermal growth factor, monocyte chemoattractant protein-1 or their ratio as predictors for rapid loss of renal function in type 2 diabetic patients with diabetic kidney disease. *BMC Nephrol*. 2018;19(1). doi:10.1186/s12882-018-1043-x
- S12. Nowak N, Skupien J, Smiles AM, et al. Markers of early progressive renal decline in type 2 diabetes suggest different implications for etiological studies and prognostic tests development. *Kidney Int*. 2018;93(5):1198-1206. doi:10.1016/j.kint.2017.11.024
- S13. Menez S, Ju W, Menon R, et al. Urinary EGF and MCP-1 and risk of CKD after cardiac surgery. *JCI Insight*. 2021;6(11):e147464.
- S14. Ascher SB, Scherzer R, Estrella MM, et al. Urine Biomarkers of Kidney Tubule Health and Incident CKD Stage 3 in Women Living With HIV: A Repeated Measures Study. *Kidney Med*. 2021;3(3):395-404.e1. doi:10.1016/j.xkme.2021.01.012
- S15. Stangou M, Alexopoulos E, Papagianni A, et al. Urinary levels of epidermal growth factor , interleukin-6 and monocyte chemoattractant protein-1 may act as predictor markers of renal function outcome in immunoglobulin A nephropathy. *Nephrology*. 2009;14:613-620. doi:10.1111/j.1440-1797.2008.01051.x
- S16. Norvik JV, Harskamp LR, Nair V, et al. Urinary excretion of epidermal growth factor and rapid loss of kidney function. *Nephrology Dialysis Transplantation*. 2021;36(10):1882-1892. doi:10.1093/ndt/gfaa208
- S17. Menez S, Wen Y, Xu L, et al. The ASSESS-AKI Study found urinary epidermal growth factor is associated with reduced risk of major adverse kidney events. *Kidney Int*. 2023;in press. doi:10.1016/j.kint.2023.08.007
- S18. Wajant H, Pfizenmaier K, Scheurich P. Tumor necrosis factor signaling. *Cell Death Differ*. 2003;10(1):45-65. doi:10.1038/sj.cdd.4401189
- S19. National Library of Medicine. TNFRSF1A TNF receptor superfamily member 1A [ Homo sapiens (human) ]. Gene. Published 2022. Accessed September 5, 2022. <https://www.ncbi.nlm.nih.gov/gene/7132#gene-expression>
- S20. Srivastava A, Schmidt IM, Palsson R, et al. The Associations of Plasma Biomarkers of Inflammation With Histopathologic Lesions, Kidney Disease Progression, and Mortality—The Boston Kidney Biopsy Cohort Study. *Kidney Int Rep*. 2021;6(3):685-694. doi:10.1016/j.ekir.2020.12.025
- S21. Niewczas MA, Gohda T, Skupien J, et al. Circulating TNF receptors 1 and 2 predict ESRD in type 2 diabetes. *Journal of the American Society of Nephrology*. 2012;23(3):507-515. doi:10.1681/ASN.2011060627

- S22. Bhatraju PK, Zelnick LR, Shlipak M, Katz R, Kestenbaum BR. Association of Soluble TNFR-1 Concentrations with Long-Term Decline in in Kidney Function: the Multi-Ethnic Study of Atherosclerosis. *J Am Soc Nephrol*. 2018;29:2713-2721.
- S23. Coca SG, Nadkarni GN, Huang Y, et al. Plasma biomarkers and kidney function decline in early and established diabetic kidney disease. *Journal of the American Society of Nephrology*. 2017;28(9):2786-2793. doi:10.1681/ASN.2016101101
- S24. Nadkarni GN, Rao V, Ismail-Beigi F, et al. Association of urinary biomarkers of inflammation, injury, and fibrosis with renal function decline: The ACCORD trial. *Clinical Journal of the American Society of Nephrology*. 2016;11(8):1343-1352. doi:10.2215/CJN.12051115
- S25. Sarnak MJ, Katz R, Ix JH, et al. Plasma Biomarkers as Risk Factors for Incident CKD. *Kidney Int Rep*. 2022;7(7):1493-1501. doi:10.1016/j.ekir.2022.03.018
- S26. Liu C, Debnath N, Mosoyan G, et al. Systematic Review and Meta-Analysis of Plasma and Urine Biomarkers for CKD Outcomes. *JASN*. 2022;33(9):1657-1672.
- S27. Sabbisetti VS, Waikar SS, Antoine DJ, et al. Blood Kidney Injury Molecule-1 Is a Biomarker of Acute and Chronic Kidney Injury and Predicts Progression to ESRD in Type I Diabetes. *JASN*. 2014;25(10):2177-2186.
- S28. Dubin RF, Judd S, Scherzer R, et al. Urinary Tubular Injury Biomarkers Are Associated With ESRD and Death in the REGARDS Study. *Kidney Int Rep*. 2018;3(5):1183-1192. doi:10.1016/j.ekir.2018.05.013
- S29. Bullen AL, Katz R, Jotwani V, et al. Biomarkers of Kidney Tubule Health, CKD Progression, and Acute Kidney Injury in SPRINT (Systolic Blood Pressure Intervention Trial) Participants. *American Journal of Kidney Diseases*. 2021;78(3):361-368.e1. doi:10.1053/j.ajkd.2021.01.021
- S30. Nadkarni GN, Chauhan K, Rao V, et al. Effect of Intensive Blood Pressure Lowering on Kidney Tubule Injury: Findings From the ACCORD Trial Study Participants. *American Journal of Kidney Diseases*. 2019;73(1):31-38. doi:10.1053/j.ajkd.2018.07.016
- S31. de Boer IH, Alpers C, El-achkar TM, et al. Rationale and design of the Kidney Precision Medicine Project. *Kidney Int*. 2021;99(3):498-510. doi:10.1053/j.gastro.2016.08.014.CagY
- S32. Dubin RF, Rhee EP. Proteomics and metabolomics in kidney disease, including insights into etiology, treatment, and prevention. *Clinical Journal of the American Society of Nephrology*. 2020;15(3):404-411. doi:10.2215/CJN.07420619
- S33. Eddy S, Mariani LH, Kretzler M. Integrated multi-omics approaches to improve classification of chronic kidney disease. *Nat Rev Nephrol*. 2020;16(11):657-668. doi:10.1038/s41581-020-0286-5
- S34. Limonte CP, Valo E, Montemayor D, et al. A targeted multi-omics approach to identify biomarkers associated with rapid eGFR decline in type 1 diabetes. *Am J Nephrol*. 2020;51(10):839-848. doi:10.1159/000510830.A

- S35. Limonte CP, Valo E, Drel V, et al. Urinary Proteomics Identifies Cathepsin D as a Biomarker of Rapid eGFR Decline in Type 1 Diabetes. *Diabetes Care*. 2022;45(6):1416-1427. doi:10.2337/dc21-2204
- S36. Kobayashi H, Looker HC, Satake E, et al. Results of untargeted analysis using the SOMAscan proteomics platform indicates novel associations of circulating proteins with risk of progression to kidney failure in diabetes. *Kidney Int*. 2022;102(2):370-381. doi:10.1016/j.kint.2022.04.022
- S37. Liu J, Nair V, Zhao YY, et al. Multi-Scalar Data Integration Links Glomerular Angiopoietin-Tie Signaling Pathway Activation With Progression of Diabetic Kidney Disease. *Diabetes*. 2022;71(12):2664-2676. doi:10.2337/db22-0169
- S38. Hirohama D, Abedini A, Moon S, et al. Unbiased Human Kidney Tissue Proteomics Identifies Matrix Metalloproteinase 7 as a Kidney Disease Biomarker. *JASN*. Published online 2023.
- S39. Kiernan E, Surapaneni A, Zhou L, et al. Alterations in the Circulating Proteome Associated with Albuminuria. *JASN*. 2023;34(6):1078-1089.
- S40. Grams M, Surapaneni A, Chen J, et al. Proteins Associated with Risk of Kidney Function Decline in the General Population. *JASN*. 2021;32(9):2291-2302.
- S41. Schlosser P, Grams ME, Rhee EP, Schlosser P, Grams ME, Rhee EP. Progress and Promise of High-Throughput Proteomics in Chronic Kidney Disease. *Mol Cell Proteomics*. 2023;22(6):100550. doi:10.1016/j.mcpro.2023.100550
- S42. National Institutes of Health. NIH awards \$50.3 million for “multi-omics” research on human health and disease. NIH News Releases. Published 2023. <https://www.nih.gov/news-events/news-releases/nih-awards-503-million-multi-omics-research-human-health-disease>
- S43. Kolli RT, Gunasekara SC, Foster MW, et al. The urinary proteome infers dysregulation of mitochondrial, lysosomal, and protein reabsorption processes in chronic kidney disease of unknown etiology (CKDu). *American Journal of Physiology-Renal Physiology*. 2023;324(4):F387-F403. doi:10.1152/ajprenal.00285.2022
